# Supplementary material for: Suppression subtractive hybridization profiles of radial growth phase and metastatic melanoma cell lines reveal novel potential targets
Source: PubMed Central journal article supplement (PMC2267200; doi:10.1186/1471-2407-8-19), 2008-01-22
Supplement: 1471-2407-8-19-S1.pdf [file 1471-2407-8-19-S1.pdf]

**Additional File 1:** Representative image of agarose gels containing PCR-amplified inserts from 96 randomly selected clones from the subtractive libraries. The images show that most clones from both RGP and Met libraries carry inserts and most of them are  $\geq 600$ bp in length.

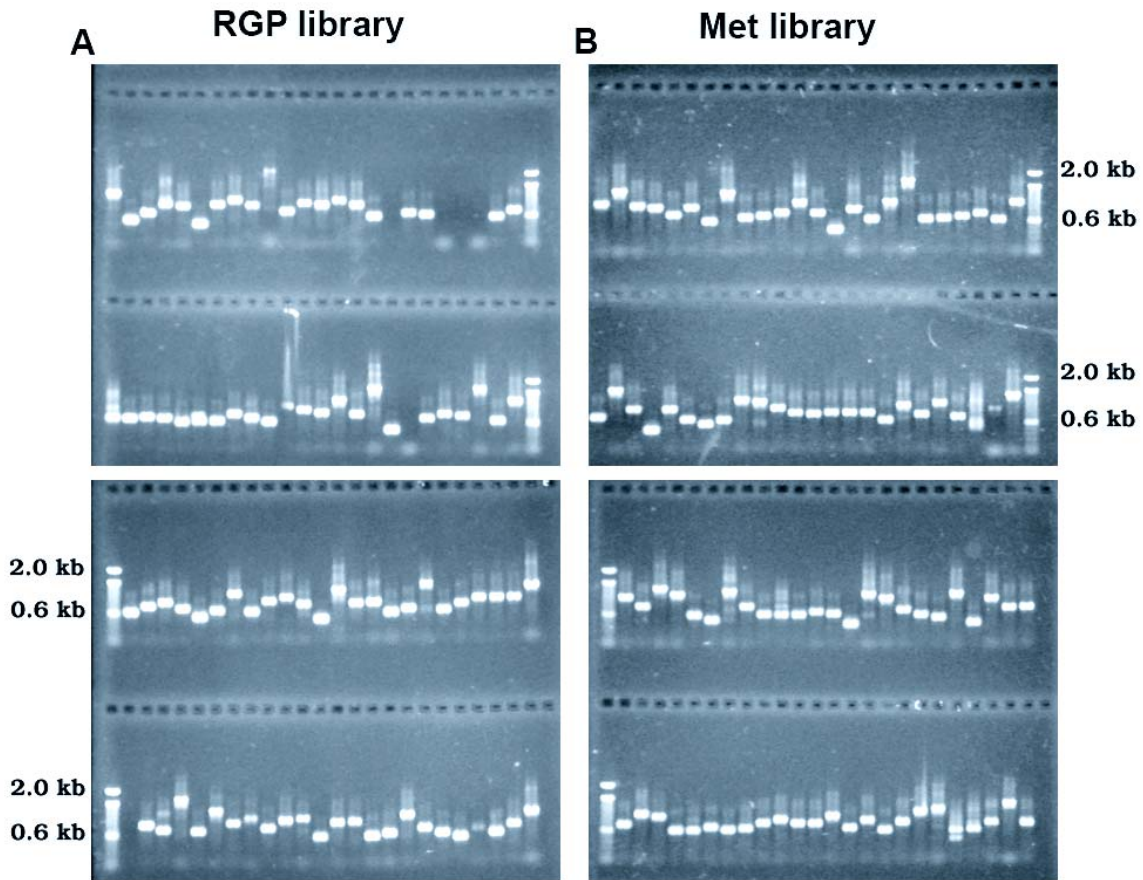

**Figure S1: Most clones from both RGP and Met libraries carry inserts.** Images from ethidium bromide stained agarose gels containing the PCR amplified inserts from 96 clones from the (A) RGP and (B) Met libraries. Molecular markers: 100 bp DNA ladder.
