# Supplementary material for: Suppression subtractive hybridization profiles of radial growth phase and metastatic melanoma cell lines reveal novel potential targets
Source: PubMed Central journal article supplement (PMC2267200; doi:10.1186/1471-2407-8-19), 2008-01-22
Supplement: 1471-2407-8-19-S2.pdf [file 1471-2407-8-19-S2.pdf]

**Additional File 2:** Complete lists of the genes identified in the RGP and Met libraries. The tables contain the identifier, the annotations of the genes represented in the RGP and Met libraries and indicate the number of occurrences for each gene among the clones sequenced from each library.

**Table S1: Genes represented in the RGP SSH library <sup>a</sup>**

| Gene                                                                     | Gene Symbol      | Accession number | Unigene   | Chromosome | Redundancy |
|--------------------------------------------------------------------------|------------------|------------------|-----------|------------|------------|
| acetyl-Coenzyme A acetyltransferase 2                                    | <b>ACAT2</b>     | NM_005891        | Hs.571037 | chr6       | 2          |
| actin, beta                                                              | <b>ACTB</b>      | NM_001101        | Hs.520640 | chr7       | 3          |
| actin, gamma 1                                                           | <b>ACTG1</b>     | NM_001614        | Hs.514581 | chr17      | 2          |
| actin-like 6A                                                            | <b>ACTL6A</b>    | NM_004301        | Hs.435326 | chr3       | 1          |
| AE(adipocyte enhancer)-binding protein 2                                 | <b>AEBP2</b>     | NM_153207        | Hs.126497 | chr12      | 1          |
| A kinase (PRKA) anchor protein (yotiao) 9                                | <b>AKAP9</b>     | NM_147166        | Hs.651221 | chr7       | 1          |
| pyrroline-5-carboxylate synthetase                                       | <b>ALDH18A1</b>  | NM_002860        | Hs.500645 | chr10      | 1          |
| aldehyde dehydrogenase 3 family, member A2                               | <b>ALDH3A2</b>   | NM_000382        | Hs.499886 | chr17      | 1          |
| aldehyde dehydrogenase 9 family, member A1                               | <b>ALDH9A1</b>   | NM_000696        | Hs.2533   | chr1       | 1          |
| amyotrophic lateral sclerosis 2 (juvenile) chromosome                    | <b>ALS2CR7</b>   | NM_139158        | Hs.348711 | chr2       | 10         |
| amphoterin induced gene 2                                                | <b>AMIGO2</b>    | NM_181847        | Hs.121520 | chr12      | 1          |
| angiopoietin 1                                                           | <b>ANGPT1</b>    | NM_001146        | Hs.369675 | chr8       | 1          |
| anillin, actin binding protein (scraps homolog,Drosophila)               | <b>ANLN</b>      | NM_018685        | Hs.62180  | chr7       | 2          |
| acidic (leucine-rich) nuclear phosphoprotein 32                          | <b>ANP32E</b>    | NM_030920        | Hs.603000 | chr1       | 1          |
| annexin A2                                                               | <b>ANXA2</b>     | NM_004039        | Hs.511605 | chr15      | 1          |
| adaptor-related protein complex 1, gamma 1 subunit                       | <b>AP1G1</b>     | NM_001128        | Hs.461253 | chr16      | 1          |
| Rho GTPase activating protein 18                                         | <b>ARHGAP18</b>  | NM_033515        | Hs.486458 | chr6       | 1          |
| ubiquitin-conjugating enzyme E2 binding protein, 1 (Drosophila)          | <b>ARIH1</b>     | NM_005744        | Hs.268787 | chr15      | 1          |
| ariadne homolog 2                                                        | <b>ARIH2</b>     | NM_006321        | Hs.31387  | chr3       | 1          |
| actin related protein 2/3 complex, subunit 3, 21kDa                      | <b>ARPC3</b>     | NM_005719        | Hs.524741 | chr12      | 1          |
| activating transcription factor 4 (tax-responsive enhancer element B67)  | <b>ATF4</b>      | NM_182810        | Hs.496487 | chr22      | 1          |
| ATP synthase, H+ transporting, mit. I F0 complex, subunit F6             | <b>ATP5J</b>     | NM_001685        | Hs.246310 | chr21      | 1          |
| alpha thalassemia/mental ret. syndrome X-linked(RAD54 h., S. cerevisiae) | <b>ATRX</b>      | NM_000489        | Hs.533526 | chrX_      | 1          |
| HLA-B associated transcript 1                                            | <b>BAT1</b>      | NM_004640        | Hs.254042 | chr6       | 1          |
| bobby sox homolog                                                        | <b>BBX</b>       | NM_020235        | Hs.124366 | chr3       | 1          |
| Bcl-2-associated transcription factor                                    | <b>BCLAF1</b>    | NM_014739        | Hs.486542 | chr6       | 1          |
| chromosome 12 open reading frame 4                                       | <b>C12orf4</b>   | NM_020374        | Hs.302977 | chr12      | 1          |
| chromosome 13 open reading frame 3                                       | <b>C13orf3</b>   | NM_145061        | Hs.88523  | chr13      | 1          |
| chromosome 14 open reading frame 108                                     | <b>C14orf108</b> | NM_018229        | Hs.528653 | chr14      | 1          |
| chromosome 14 open reading frame 112                                     | <b>C14orf112</b> | NM_016468        | Hs.137108 | chr14      | 1          |
| chromosome 14 open reading frame 2                                       | <b>C14orf2</b>   | NM_004894        | Hs.109052 | chr14      | 1          |
| chromosome 15 open reading frame 41                                      | <b>C15orf41</b>  | NM_032499        | Hs.48348  | chr15      | 1          |
| chromosome 1 open reading frame 103                                      | <b>C1orf103</b>  | NM_018372        | Hs.25245  | chr1       | 1          |
| chromosome 21 open reading frame 6                                       | <b>C21orf6</b>   | NM_016940        | Hs.34136  | chr21      | 1          |
| chromosome 4 open reading frame 27                                       | <b>C4orf27</b>   | NM_017867        | Hs.406756 | chr4       | 1          |

|                                                                           |                            |           |           |       |            |
|---------------------------------------------------------------------------|----------------------------|-----------|-----------|-------|------------|
| 6 open reading frame 166                                                  | <b>C6orf166</b>            | NM_018064 | Hs.485915 | chr6  | 1          |
| chromosome 6 open reading frame 96                                        | <b>C6orf96</b>             | NM_017909 | Hs.486835 | chr6  | 1          |
| calcium binding protein 39                                                | <b>CAB39</b>               | NM_016289 | Hs.632536 | chr2  | 1          |
| adenylate cyclase-associated protein, 2                                   | <b>CAP2</b>                | AL832154  | Hs.132902 | chr6  | 1          |
| calpain 2, (m/II) large subunit                                           | <b>CAPN2</b>               | NM_001748 | Hs.350899 | chr1  | 1          |
| coiled-coil domain containing 80                                          | <b>CCDC80</b>              | NM_199511 | Hs.477128 | chr3  | 1          |
| coiled-coil domain containing 82                                          | <b>CCDC82</b>              | NM_024725 | Hs.525088 | chr11 | 1          |
| cyclin B1                                                                 | <b>CCNB1</b>               | NM_031966 | Hs.23960  | chr5  | 1          |
| cyclin I                                                                  | <b>CCNI</b>                | NM_006835 | Hs.648010 | chr4  | 1          |
| CD164 antigen, sialomucin                                                 | <b>CD164<sup>b</sup></b>   | NM_006016 | Hs.520313 | chr6  | 1RGP, 1MET |
| non-kinase Cdc42 effector protein SPEC2                                   | <b>CDC42SE2</b>            | NM_020240 | Hs.508829 | chr5  | 1          |
| cell division cycle 73, Paf1/RNA polymerase II complex component, homolog | <b>CDC73</b>               | NM_024529 | Hs.576497 | chr1  | 1          |
| centromere protein N                                                      | <b>CENPN</b>               | NM_018455 | Hs.55028  | chr16 | 1          |
| H factor 1 (complement) (HF1)                                             | <b>CFH</b>                 | NM_000186 | Hs.363396 | chr1  | 5          |
| coiled-coil-helix-coiled-coil-helix domain containing 7                   | <b>CHCHD7</b>              | NM_024300 | Hs.436913 | chr8  | 1          |
| C-type lectin domain family 2, member B                                   | <b>CLECSF2<sup>b</sup></b> | NM_005127 | Hs.85201  | chr12 | 1RGP, 1MET |
| chloride intracellular channel 4                                          | <b>CLIC4</b>               | NM_013943 | Hs.440544 | chr1  | 1          |
| cornichon homolog 4                                                       | <b>CNIH4</b>               | NM_014184 | Hs.445890 | chr1  | 1          |
| CCR4-NOT transcription complex, subunit 7                                 | <b>CNOT7</b>               | NM_054026 | Hs.598387 | chr8  | 2          |
| coagulation factor C homolog, cochlin                                     | <b>COCH</b>                | NM_004086 | Hs.21016  | chr14 | 1          |
| collagen, type XV, alpha 1                                                | <b>COL15A1</b>             | NM_001855 | Hs.409034 | chr9  | 1          |
| CGI-120 protein                                                           | <b>COPZ1<sup>b</sup></b>   | NM_016057 | Hs.505652 | chr12 | 1RGP, 1MET |
| coronin, actin binding protein, 1C                                        | <b>CORO1C</b>              | NM_014325 | Hs.637894 | chr12 | 1          |
| cytochrome c oxidase subunit VIIa polypeptide 2                           | <b>COX7A2</b>              | NM_001865 | Hs.70312  | chr6  | 1          |
| copine III                                                                | <b>CPNE3</b>               | NM_003909 | Hs.191219 | chr8  | 1          |
| cutA divalent cation tolerance homolog                                    | <b>CUTA</b>                | NM_015921 | Hs.520070 | chr6  | 1          |
| chemokine (C-X-C motif) ligand 11                                         | <b>CXCL11</b>              | NM_005409 | Hs.632592 | chr4  | 2          |
| DAZ associated protein 2                                                  | <b>DAZAP2</b>              | NM_014764 | Hs.369761 | chr12 | 1          |
| decorin                                                                   | <b>DCN</b>                 | NM_133503 | Hs.156316 | chr12 | 8          |
| DCP2 decapping enzyme homolog                                             | <b>DCP2</b>                | NM_152624 | Hs.443875 | chr5  | 1          |
| dynactin 4 (p62)                                                          | <b>DCTN4</b>               | NM_016221 | Hs.328865 | chr5  | 1          |
| dynactin 6                                                                | <b>DCTN6</b>               | NM_006571 | Hs.158427 | chr8  | 1          |
| EST DKFZp781I0229                                                         | <b>DCUN1D1</b>             | BX643780  | Hs.104613 | chr3  | 1          |
| DEAD (Asp-Glu-Ala-Asp) box polypeptide 1                                  | <b>DDX1</b>                | NM_004939 | Hs.440599 | chr2  | 2          |
| DEAD (Asp-Glu-Ala-Asp) box polypeptide 17                                 | <b>DDX17</b>               | NM_030881 | Hs.528305 | chr22 | 1          |
| DEAD (Asp-Glu-Ala-Asp) box polypeptide 23                                 | <b>DDX23</b>               | NM_004818 | Hs.130098 | chr12 | 1          |
| DEAD/H (Asp-Glu-Ala-Asp/His) box polypeptide 27                           | <b>DDX27</b>               | NM_017895 | Hs.65234  | chr20 | 1          |
| DEAD (Asp-Glu-Ala-Asp) box polypeptide 3, X-linked                        | <b>DDX3X</b>               | NM_001356 | Hs.380774 | chrX  | 1          |
| denticleless homolog                                                      | <b>DTL</b>                 | NM_016448 | Hs.126774 | chr1  | 1          |
| DTW domain containing 1                                                   | <b>DTWD1</b>               | NM_020234 | Hs.127432 | chr15 | 1          |
| dynein, cytoplasmic, intermediate polypeptide 2                           | <b>DYNC1I2</b>             | NM_001378 | Hs.546250 | chr2  | 1          |
| epithelial cell transforming sequence 2 oncogene                          | <b>ECT2</b>                | NM_018098 | Hs.518299 | chr3  | 1          |
| clone IMAGE:3629020                                                       | <b>EIF4B</b>               | BC013994  | Hs.292063 | chr12 | 1          |
| cDNA: FLJ23586 fis                                                        | <b>EIF4E2</b>              | AK027239  | Hs.292026 | chr2  | 1          |
| eukaryotic translation initiation factor 4 gamma                          | <b>EIF4G2</b>              | NM_001418 | Hs.183684 | chr11 | 2          |

|                                                                           |                            |              |           |       |            |
|---------------------------------------------------------------------------|----------------------------|--------------|-----------|-------|------------|
| ELAV (embryonic lethal, ab.vision, Drosolike(Hu antigen R) ectonucleotide | <b>ELAVL1</b>              | NM_001419    | Hs.184492 | chr19 | 1          |
| pyrophosphatase/phosphodiesterase 1                                       | <b>ENPP1</b>               | NM_006208    | Hs.527295 | chr6  | 1          |
| family with sequence similarity 29                                        | <b>FAM29A</b>              | NM_017645    | Hs.533468 | chr9  | 1          |
| cDNA FLJ31911 fis                                                         | <b>FAM33A</b>              | AK056473     | Hs.463607 | chr17 | 2          |
| family with sequence similarity 54                                        | <b>FAM54A</b>              | NM_138419    | Hs.121536 | chr6  | 2          |
| family with sequence similarity 60                                        | <b>FAM60A</b> <sup>b</sup> | NM_021238    | Hs.505154 | chr12 | 1RGP, 1MET |
| family with sequence similarity 62                                        | <b>FAM62A</b>              | NM_015292    | Hs.632729 | chr12 | 1          |
| F-box only protein 5                                                      | <b>FBXO5</b>               | NM_012177    | Hs.645478 | chr6  | 1          |
| farnesyl diphosphate synthase                                             | <b>FDPS</b>                | NM_002004    | Hs.335918 | chr1  | 1          |
| FGFR1 oncogene partner 2                                                  | <b>FGFR1OP2</b>            | NM_015633    | Hs.591162 | chr12 | 1          |
| hypothetical protein FLJ10292                                             | <b>FLJ10292</b>            | NM_018048    | Hs.104650 | chr12 | 1          |
| hypothetical protein FLJ11184                                             | <b>FLJ11184</b>            | NM_018352    | Hs.267446 | chr4  | 1          |
| hypothetical protein DKFZp566D234                                         | <b>FSTL5</b>               | NM_020116    | Hs.591707 | chr4  | 3          |
| GATA binding protein 3                                                    | <b>GATA3</b>               | NM_002051    | Hs.524134 | chr10 | 1          |
| FLJ38642 fis                                                              | <b>GJA7</b>                | AK095961     | Hs.596755 | chr17 | 1          |
| glycosyltransferase AD-017                                                | <b>GLT8D1</b>              | NM_018446    | Hs.297304 | chr3  | 1          |
| guanine nucleotide binding protein (G protein) gamma 11                   | <b>GNG11</b>               | NM_004126    | Hs.83381  | chr7  | 2          |
| full length insert cDNA clone EUROIMAGE 1674211                           | <b>GTF3C4</b>              | AJ420430     | Hs.22302  | chr9  | 1          |
| cDNA: FLJ22132 fis                                                        | <b>H2AFV</b>               | AK025785     | Hs.488189 | chr7  | 1          |
| H3 histone, family 3A                                                     | <b>H3F3A</b>               | NM_002107    | Hs.546259 | chr2  | 1          |
| histone acetyltransferase 1                                               | <b>HAT1</b>                | NM_003642    | Hs.632532 | chr2  | 1          |
| histone deacetylase 1                                                     | <b>HDAC1</b>               | NM_004964    | Hs.88556  | chr12 | 1          |
| high-mobility group box 2                                                 | <b>HMGB2</b>               | NM_002129    | Hs.434953 | chr4  | 2          |
| cDNA: FLJ22083 fis,                                                       | <b>HMGCS1</b>              | AK025736     | Hs.397729 | chr5  | 1          |
| hypothetical protein FLJ10637                                             | <b>HMGN3</b>               | NM_018164    | Hs.505077 | chr12 | 1          |
| heterogeneous nuclear ribonucleoprotein C (C1/C2)                         | <b>HNRPC</b>               | NM_031314    | Hs.508848 | chr14 | 1          |
| heterogeneous nuclear ribonucleoprotein U (scaffold attachment factor A)  | <b>HNRPU</b>               | AF068846     | Hs.166463 | chr1  | 1          |
| heat shock protein 90kDa alpha (cytosolic), class A member 1              | <b>HSP90AA1</b>            | NM_001017963 | Hs.525600 | chr14 | 1          |
| NAD(P) dependent steroid dehydrogenase-like                               | <b>HSPC105</b>             | NM_145168    | Hs.87779  | chr16 | 1          |
| MSTP028 protein                                                           | <b>KCTD10</b>              | NM_031954    | Hs.524731 | chr12 | 1          |
| potassium channel tetramerisation domain containing 3                     | <b>KCTD3</b>               | NM_016121    | Hs.335139 | chr1  | 2          |
| FLJ32145 fis                                                              | <b>KIAA0460</b>            | AK056707     | Hs.213666 | chr1  | 1          |
| kinesin family member 5B                                                  | <b>KIF5B</b>               | NM_004521    | Hs.591373 | chr10 | 1          |
| kinesin-associated protein 3                                              | <b>KIFAP3</b>              | NM_014970    | Hs.433442 | chr1  | 1          |
| kelch-like 4 (Drosophila)                                                 | <b>KLHL4</b>               | NM_019117    | Hs.49075  | chrX  | 1          |
| lamin B receptor                                                          | <b>LBR</b>                 | NM_002296    | Hs.435166 | chr1  | 1          |
| leptin receptor                                                           | <b>LEPR</b>                | NM_002303    | Hs.23581  | chr1  | 1          |
| hypothetical protein LOC643079                                            | <b>LOC643079</b>           | NM_001039896 | Hs.591760 | chr5  | 1          |
| hypothetical protein FLJ36812                                             | <b>LRRC57</b>              | NM_153260    | Hs.234681 | chr15 | 1          |
| LSM5 homolog, U6 small nuclear RNA associated (Scerevisiae)               | <b>LSM5</b>                | NM_012322    | Hs.424908 | chr7  | 1          |
| latent transforming growth factor beta binding protein 1                  | <b>LTBP1</b>               | NM_000627    | Hs.49787  | chr2  | 1          |
| lumican                                                                   | <b>LUM</b>                 | NM_002345    | Hs.406475 | chr12 | 1          |

|                                                                   |                           |              |           |       |            |
|-------------------------------------------------------------------|---------------------------|--------------|-----------|-------|------------|
| melanoma antigen family C, 2                                      | <b>MAGEC2</b>             | NM_016249    | Hs.123536 | chrX  | 1          |
| hypothetical protein MGC44669                                     | <b>MBOAT1</b>             | NM_175879    | Hs.377830 | chr6  | 4          |
| malate dehydrogenase 1, NAD (soluble)                             | <b>MDH1</b>               | NM_005917    | Hs.526521 | chr2  | 1          |
| nuclear protein double minute 1                                   | <b>MDM1</b>               | NM_017440    | Hs.591036 | chr12 | 1          |
| FLJ39869 fis                                                      | <b>MDM4</b>               | AK097188     | Hs.497492 | chr1  | 1          |
| microfibrillar-associated protein 4                               | <b>MFAP4</b>              | NM_002404    | Hs.296049 | chr17 | 3          |
| mitochondrial ribosomal protein L48                               | <b>MRPL48</b>             | NM_016055    | Hs.503239 | chr11 | 1          |
| c-myc binding protein                                             | <b>MYCBP</b>              | NM_012333    | Hs.591506 | chr1  | 2          |
| MYST histone acetyltransferase 2                                  | <b>MYST2</b>              | NM_007067    | Hs.21907  | chr17 | 1          |
| hypothetical protein DJ328E19.C1.1                                | <b>NBPF14<sup>b</sup></b> | NM_015383    | Hs.607640 | chr1  | 2RGP, 1MET |
| neural precursor cell expressed, developmentally down-regulated 1 | <b>NEDD1</b>              | NM_152905    | Hs.270084 | chr12 | 1          |
| NEFA-interacting nuclear protein NIP30                            | <b>NIP30</b>              | NM_024946    | Hs.396740 | chr16 | 1          |
| NME7                                                              | <b>NME7</b>               | NM_013330    | Hs.651246 | chr1  | 2          |
| non-POU domain containing, octamer-binding                        | <b>NONO</b>               | NM_007363    | Hs.533282 | chrX  | 1          |
| similar to rat nuclear ubiquitous casein kinase 2                 | <b>NUCKS1</b>             | NM_022731    | Hs.632458 | chr1  | 2          |
| nucleoporin 160kDa                                                | <b>NUP160</b>             | NM_015231    | Hs.643526 | chr11 | 3          |
| nucleoporin Nup37                                                 | <b>NUP37</b>              | NM_024057    | Hs.444276 | chr12 | 1          |
| olfactory receptor, family 51, subfamily E, member 2              | <b>OR51E2</b>             | NM_030774    | Hs.501758 | chr21 | 2          |
| origin recognition complex, subunit 2-like (yeast)                | <b>ORC2L</b>              | NM_006190    | Hs.444870 | chr2  | 1          |
| oxysterol binding protein-like 8                                  | <b>OSBPL8</b>             | NM_020841    | Hs.430849 | chr12 | 1          |
| OTU domain containing 6B                                          | <b>OTUD6B</b>             | NM_016023    | Hs.30532  | chr8  | 1          |
| 3-oxoacid CoA transferase                                         | <b>OXCT1</b>              | NM_000436    | Hs.278277 | chr5  | 1          |
| hypothetical protein FLJ20604                                     | <b>OXSM</b>               | NM_017897    | Hs.55781  | chr3  | 1          |
| platelet-activating factor acetylhydrolase                        | <b>PAFAH1B1</b>           | NM_000430    | Hs.77318  | chr17 | 1          |
| phosphoribosylaminoimidazole carboxylase                          | <b>PAICS</b>              | NM_006452    | Hs.518774 | chr4  | 1          |
| pre-B-cell colony-enhancing factor                                | <b>PBEF1<sup>b</sup></b>  | NM_005746    | Hs.489615 | chr7  | 1RGP, 1MET |
| dendritic cell protein                                            | <b>PCID1</b>              | NM_006360    | Hs.502244 | chr11 | 1          |
| platelet derived growth factor C                                  | <b>PDGFC</b>              | NM_016205    | Hs.570855 | chr4  | 1          |
| paternally expressed 10                                           | <b>PEG10</b>              | NM_015068    | Hs.147492 | chr7  | 1          |
| PHD finger protein 17                                             | <b>PHF17</b>              | NM_024900    | Hs.12420  | chr4  | 1          |
| PHD finger protein 20                                             | <b>PHF20</b>              | NM_016436    | Hs.517044 | chr20 | 2          |
| phosphoinositide-3-kinase, class 3                                | <b>PIK3C3</b>             | NM_002647    | Hs.464971 | chr18 | 1          |
| pogo transposable element with ZNF domain                         | <b>POGZ</b>               | NM_015100    | Hs.591471 | chr1  | 2          |
| KIAA0039                                                          | <b>POLD3</b>              | D26018       | Hs.82502  | chr11 | 2          |
| polymerase (RNA) III (DNA directed) (62kD)                        | <b>POLR3C</b>             | NM_006468    | Hs.591457 | chr1  | 1          |
| protection of telomeres 1                                         | <b>POT1</b>               | NM_015450    | Hs.31968  | chr7  | 1          |
| phosphoribosyl pyrophosphate amidotransferase                     | <b>PPAT</b>               | NM_002703    | Hs.331420 | chr4  | 1          |
| protein phosphatase 1, regulatory (inhibitor) subunit 11          | <b>PPP1R11</b>            | NM_021959    | Hs.82887  | chr6  | 1          |
| protein phosphatase 1, regulatory (inhibitor) subunit 12A         | <b>PPP1R12A</b>           | NM_002480    | Hs.49582  | chr12 | 1          |
| phosphatase 2, regulatory subunit B (B56) gamma isoform           | <b>PPP2R5C</b>            | NM_178588    | Hs.368264 | chr14 | 1          |
| palmitoyl-protein thioesterase 1                                  | <b>PPT1</b>               | NM_000310    | Hs.3873   | chr1  | 2          |
| prolyl endopeptidase-like                                         | <b>PREPL</b>              | NM_001042385 | Hs.444349 | chr2  | 1          |
| phosphoribosyl pyrophosphate synthetase 2                         | <b>PRPS2</b>              | NM_002765    | Hs.104123 | chrX  | 1          |
| pleckstrin homology, Sec7 and coiled-coil domains                 | <b>PSCDBP</b>             | NM_004288    | Hs.270    | chr2  | 1          |

|                                                                                |                             |              |           |       |            |
|--------------------------------------------------------------------------------|-----------------------------|--------------|-----------|-------|------------|
| proteasome (prosome, macropain) subunit, alpha type, 4                         | <b>PSMA4</b>                | NM_002789    | Hs.251531 | chr15 | 3          |
| proteasome (prosome, macropain) subunit, alpha type, 5                         | <b>PSMA5</b>                | NM_002790    | Hs.485246 | chr1  | 1          |
| proteasome (prosome, macropain) subunit, beta type, 4                          | <b>PSMB4</b>                | NM_002796    | Hs.89545  | chr1  | 1          |
| proteasome (prosome, macropain) subunit, beta type, 6                          | <b>PSMB6</b>                | NM_002798    | Hs.77060  | chr17 | 1          |
| prostaglandin-endoperoxide synthase 2                                          | <b>PTGS2</b>                | NM_000963    | Hs.196384 | chr1  | 1          |
| peroxisomal membrane protein 3, 35kDa                                          | <b>PXMP3</b>                | NM_000318    | Hs.592781 | chr8  | 1          |
| RAD23 homolog B                                                                | <b>RAD23B</b>               | NM_002874    | Hs.521640 | chr9  | 1          |
| RAN, member RAS oncogene family                                                | <b>RAN</b>                  | NM_006325    | Hs.10842  | chr6  | 1          |
| karyopherin (importin) beta 3                                                  | <b>RANBP5</b>               | NM_002271    | Hs.643743 | chr13 | 1          |
| arginyl-tRNA synthetase-like                                                   | <b>RARSL</b>                | NM_020320    | Hs.485910 | chr6  | 1          |
| retinoblastoma binding protein 5                                               | <b>RBBP5</b>                | NM_005057    | Hs.519230 | chr1  | 1          |
| RNA binding motif protein 25                                                   | <b>RBM25</b>                | NM_021239    | Hs.531106 | chr14 | 2          |
| RNA binding motif protein 34                                                   | <b>RBM34</b>                | NM_015014    | Hs.535224 | chr1  | 1          |
| chromosome condensation 1-like                                                 | <b>RCBTB2</b>               | NM_001268    | Hs.25447  | chr13 | 1          |
| v-rel reticuloendotheliosis viral oncogene homolog (avian)                     | <b>REL</b>                  | NM_002908    | Hs.631886 | chr2  | 1          |
| regulator of G-protein signalling 2, 24kDa                                     | <b>RGS2</b>                 | NM_002923    | Hs.78944  | chr1  | 2          |
| ribosomal protein S27a                                                         | <b>RPS27A</b>               | NM_002954    | Hs.546292 | chr2  | 1          |
| RNA polymerase I transcription factor RRN3                                     | <b>RRN3</b>                 | NM_018427    | Hs.460078 | chr16 | 1          |
| runt-related transcription factor 2                                            | <b>RUNX2</b>                | NM_001015051 | Hs.535845 | chr6  | 2          |
| secretogranin II (chromogranin C)                                              | <b>SCG2</b>                 | NM_003469    | Hs.516726 | chr2  | 1          |
| secretory granule, neuroendocrine protein 1 (7B2protein)                       | <b>SCG5</b>                 | NM_003020    | Hs.156540 | chr15 | 1          |
| SEC24 related gene family, member C                                            | <b>SEC24C</b>               | NM_004922    | Hs.81964  | chr10 | 1          |
| semaphorin 3A                                                                  | <b>SEMA3A</b>               | NM_006080    | Hs.252451 | chr7  | 1          |
| SUMO-1-specific protease                                                       | <b>SENP6</b>                | NM_015571    | Hs.485784 | chr6  | 1          |
| Similar to gene CDC10 cell division cycle 10 homolog                           | <b>SEPT7</b>                | NM_001788    | Hs.191346 | chr7  | 1          |
| SET translocation (myeloid leukemia-associated)                                | <b>SET</b>                  | NM_003011    | Hs.436687 | chr9  | 2          |
| splicing factor 3a, subunit 3, 60kDa                                           | <b>SF3A3</b>                | NM_006802    | Hs.77897  | chr1  | 1          |
| splicing factor 3b, subunit 1, 155kDa                                          | <b>SF3B1</b>                | NM_012433    | Hs.632554 | chr2  | 1          |
| survival of motor neuron protein interacting protein 1                         | <b>SIP1</b>                 | NM_003616    | Hs.645400 | chr14 | 1          |
| solute carrier family 16 (monocarboxylic acidtransporters), member 1           | <b>SLC16A1</b>              | NM_003051    | Hs.75231  | chr1  | 1          |
| solute carrier family 25 (mitochondrial carrier; phosphate carrier), member 24 | <b>SLC25A24</b>             | NM_013386    | Hs.132553 | chr1  | 1          |
| solute carrier family 35, member B1                                            | <b>SLC35B1</b>              | NM_005827    | Hs.154073 | chr17 | 2          |
| solute carrier family 38, member 2                                             | <b>SLC38A2</b> <sup>b</sup> | NM_018976    | Hs.221847 | chr12 | 1RGP, 1MET |
| homolog of rat orphan transporter v7-3                                         | <b>SLC6A15</b>              | NM_182767    | Hs.44424  | chr12 | 1          |
| homolog of C. elegans smu-1                                                    | <b>SMU1</b>                 | NM_018225    | Hs.642743 | chr9  | 1          |
| SET and MYND domain containing 3                                               | <b>SMYD3</b>                | NM_022743    | Hs.567571 | chr1  | 1          |
| small nuclear ribonucleoprotein polypeptide G                                  | <b>SNRPG</b> <sup>b</sup>   | NM_003096    | Hs.516076 | chr2  | 1RGP, 1MET |
| SRY (sex determining region Y)-box 4                                           | <b>SOX4</b>                 | NM_003107    | Hs.643910 | chr6  | 1          |
| synovial sarcoma translocation, chromosome 18                                  | <b>SS18</b>                 | NM_005637    | Hs.404263 | chr18 | 1          |
| signal sequence receptor, beta                                                 | <b>SSR2</b>                 | NM_003145    | Hs.74564  | chr1  | 1          |
| stathmin 1/oncoprotein 18                                                      | <b>STMN1</b>                | NM_005563    | Hs.209983 | chr1  | 1          |
| activated RNA polymerase II transcription                                      | <b>SUB1</b>                 | NM_006713    | Hs.229641 | chr5  | 1          |

cofactor 4

|                                                                     |                          |              |           |       |            |
|---------------------------------------------------------------------|--------------------------|--------------|-----------|-------|------------|
| NS1-associated protein 1                                            | <b>SYNCRIP</b>           | NM_006372    | Hs.571177 | chr6  | 1          |
| SPT3-associated factor 42                                           | <b>TADA1L</b>            | NM_053053    | Hs.435967 | chr1  | 1          |
| TAF12 RNA polymerase II, TATA box binding protein(TBP)-associated   | <b>TAF12</b>             | NM_005644    | Hs.530251 | chr1  | 1          |
| hypothetical protein FLJ11046                                       | <b>TBC1D23</b>           | NM_018309    | Hs.477003 | chr3  | 1          |
| transducin (beta)-like 1X-linked receptor 1                         | <b>TBL1XR1</b>           | NM_024665    | Hs.581171 | chr3  | 1          |
| transcription elongation factor A (SII)-like 8                      | <b>TCEAL8</b>            | NM_001006684 | Hs.389734 | chrX  | 1          |
| testis derived transcript (3 LIM domains)                           | <b>TES</b>               | NM_152829    | Hs.592286 | chr7  | 1          |
| putative MAPK activating protein (MGC3794)                          | <b>TIPRL</b>             | NM_152902    | Hs.209431 | chr1  | 1          |
| toll-like receptor 3                                                | <b>TLR3</b>              | NM_003265    | Hs.543332 | chr4  | 1          |
| transmembrane protein 50B                                           | <b>TMEM50B</b>           | NM_006134    | Hs.433668 | chr21 | 1          |
| hypothetical protein MAC30                                          | <b>TMEM97</b>            | NM_014573    | Hs.199695 | chr17 | 1          |
| hypothetical protein FLJ90492                                       | <b>TMTC3<sup>b</sup></b> | NM_181783    | Hs.331268 | chr12 | 2RGP, 1MET |
| thiopurine S-methyltransferase                                      | <b>TPMT</b>              | NM_000367    | Hs.444319 | chr6  | 1          |
| transcriptional intermediary factor 1                               | <b>TRIM24</b>            | NM_003852    | Hs.490287 | chr7  | 1          |
| transcription termination factor, RNA polymerase II                 | <b>TTF2</b>              | NM_003594    | Hs.486818 | chr1  | 1          |
| tRNA-yW synthesizing protein 3 homolog                              | <b>TYW3</b>              | NM_138467    | Hs.348411 | chr1  | 1          |
| UDP-N-acetylglucosamine pyrophosphorylase 1                         | <b>UAP1</b>              | NM_003115    | Hs.492859 | chr1  | 1          |
| ubiquitin-conjugating enzyme E2A (RAD6 homolog)                     | <b>UBE2A</b>             | NM_003336    | Hs.379466 | chrX  | 1          |
| ubiquitin-conjugating enzyme E2Q (putative)                         | <b>UBE2Q1</b>            | NM_017582    | Hs.607928 | chr1  | 1          |
| ubiquinol-cytochrome c reductase complex (7.2 kD)                   | <b>UCRC</b>              | NM_013387    | Hs.284292 | chr22 | 1          |
| pVHL-interacting deubiquitinating enzyme 1                          | <b>USP33</b>             | NM_015017    | Hs.480597 | chr1  | 1          |
| ubiquitin specific protease 8                                       | <b>USP8</b>              | NM_005154    | Hs.644563 | chr15 | 1          |
| vacuolar protein sorting 33A (yeast)                                | <b>VPS33A</b>            | NM_022916    | Hs.592009 | chr12 | 1          |
| pumilio homolog 2 (Drosophila)                                      | <b>VPS35</b>             | NM_015317    | Hs.467824 | chr2  | 1          |
| Wiskott-Aldrich syndrome protein interacting protein                | <b>WASPIP</b>            | NM_003387    | Hs.591641 | chr2  | 1          |
| WD repeat membrane protein 19                                       | <b>WDR19</b>             | NM_025132    | Hs.438482 | chr4  | 1          |
| WD repeat domain 35                                                 | <b>WDR35</b>             | NM_001006657 | Hs.205427 | chr2  | 2          |
| wingless-type MMTV integration site family, member 5A               | <b>WNT5A</b>             | NM_003392    | Hs.643085 | chr3  | 1          |
| Ku autoantigen, 80kDa                                               | <b>XRCC5</b>             | NM_021141    | Hs.388739 | chr2  | 1          |
| 5'-3' exoribonuclease 2                                             | <b>XRN2</b>              | NM_012255    | Hs.255932 | chr20 | 1          |
| xylosyltransferase I                                                | <b>XYLT1</b>             | NM_022166    | Hs.22907  | chr16 | 1          |
| YME1-like 1 (S. cerevisiae) (YME1L1)                                | <b>YME1L1</b>            | NM_139313    | Hs.499145 | chr10 | 1          |
| tyrosine 3-monooxyg./tryp. 5-monooxyg.activ. prot, zeta polypeptide | <b>YWHAZ<sup>b</sup></b> | NM_145690    | Hs.492407 | chr8  | 1RGP, 1MET |
| sterile alpha motif and leucine zipper containingkinase AZK         | <b>ZAK</b>               | NM_133646    | Hs.444451 | chr2  | 1          |
| CCHC domain containing 9                                            | <b>ZCCHC9</b>            | NM_032280    | Hs.15536  | chr5  | 1          |
| zinc finger, CDGSH-type domain 1                                    | <b>ZCD1</b>              | NM_018464    | Hs.370102 | chr10 | 1          |
| zinc finger, DHHC domain containing 4                               | <b>ZDHHC4</b>            | NM_018106    | Hs.5268   | chr7  | 1          |
| zinc finger protein 146                                             | <b>ZNF146</b>            | NM_007145    | Hs.643436 | chr19 | 1          |
| zinc finger protein 41                                              | <b>ZNF41</b>             | NM_153380    | Hs.496074 | chrX  | 1          |
| NFX1-type containing 1                                              | <b>ZNFX1</b>             | NM_021035    | Hs.371794 | chr20 | 1          |
| cDNA FLJ35976 fis                                                   |                          | AK093295     |           | chr1  | 1          |
| cDNA IMAGE:4513453                                                  |                          | BC039469     | Hs.213061 | chr1  | 1          |

|                                       |          |           |       |   |
|---------------------------------------|----------|-----------|-------|---|
| cDNA IMAGE:5274919                    | BC033943 | Hs.146268 | chr1  | 1 |
| cDNA RNA, FLJ21487                    | AK025140 | Hs.552608 | chr1  | 1 |
| cDNA IMAGE:3028427                    | BC007568 |           | chr1  | 1 |
| cDNA DKFZp564O0122                    | AL049951 | Hs.567380 | chr1  | 1 |
| EST                                   | BX108371 | Hs.201921 | chr1  | 1 |
| EST                                   | BE613231 | Hs.551847 | chr1  | 1 |
| EST                                   | AF130080 | Hs.213061 | chr1  | 1 |
| EST                                   | AK025818 | Hs.497575 | chr1  | 1 |
| EST                                   | AK056963 | Hs.193557 | chr1  | 1 |
| EST                                   | AA863123 | Hs.314413 | chr13 | 1 |
| EST                                   | AA811365 | Hs.648594 | chr14 | 1 |
| EST                                   | AA811365 | Hs.648594 | chr14 | 1 |
| cDNA DKFZp686D05115                   | BX537575 | Hs.643531 | chr16 | 1 |
| cDNA clone IMAGE:4812621, partial cds | BC051737 | Hs.597434 | chr17 | 1 |
| EST                                   | DW462341 | Hs.527989 | chr17 | 1 |
| EST                                   | CR604143 | Hs.644653 | chr18 | 1 |
| EST                                   | BX482566 | Hs.407368 | chr19 | 1 |
| EST                                   | BU733606 | Hs.572539 | chr19 | 1 |
| EST                                   | AK094953 | Hs.645225 | chr19 | 1 |
| EST                                   | AK094953 | Hs.645225 | chr19 | 1 |
| EST                                   | CB857860 | Hs.529272 | chr2  | 1 |
| EST                                   | AA723885 | Hs.516159 | chr2  | 1 |
| EST                                   | BU740841 | Hs.565756 | chr21 | 1 |
| cDNA clone IMAGE:4066387 5'           | BF688069 | Hs.307772 | chr3  | 1 |
| cDNA FLJ12839 fis                     | AK022901 | Hs.636869 | chr3  | 1 |
| EST                                   | AA248847 | Hs.478000 | chr3  | 1 |
| cDNA clone IMAGE:4839074              | BC047586 | Hs.348292 | chr5  | 1 |
| cDNA FLJ14232                         | AK024294 | Hs.114033 | chr6  | 1 |
| cDNA FLJ33993 fis                     | AK091312 | Hs.408455 | chr6  | 1 |
| EST                                   | DA435874 | Hs.592692 | chr6  | 1 |
| EST                                   | BF891265 | Hs.519930 | chr6  | 1 |
| EST                                   | BX105502 | Hs.409578 | chr6  | 1 |
| EST                                   | BQ371274 |           | chr7  | 1 |
| EST                                   | DB351554 | Hs.372541 | chr7  | 1 |
| EST                                   | DB351554 | Hs.372541 | chr7  | 1 |
| cDNA FLJ25402 fis                     | AK058131 | Hs.104941 | chr8  | 1 |
| cDNA FLJ42399 fis                     | AK124390 | Hs.592775 | chr8  | 1 |
| cDNA DKFZp686L07201                   | BX537532 | Hs.355559 | chrX  | 1 |

<sup>a</sup> Identification was done by BLAST or BLAT searches with the ESTs (deposited under GenBank accession numbers: ES315683-ES316049) obtained from RGP SSH library.

<sup>b</sup> Genes identified in both RGP and Met SSH libraries

**Table S2: Genes represented in the Met SSH library<sup>a</sup>**

| Gene Name                                                                                                              | Gene Symbol                | Accession number | Unigene   | Chromosome | Redundancy |
|------------------------------------------------------------------------------------------------------------------------|----------------------------|------------------|-----------|------------|------------|
| alpha-2-macroglobulin                                                                                                  | <b>A2M</b>                 | NM_000014        | Hs.212838 | chr12      | 12         |
| ATP-binding cassette, sub-family B (MDR/TAP), member 5, mRNA (cDNA clone IMAGE:5539117), with apparent retained intron | <b>ABCB5</b>               | NM_178559        | Hs.404102 | chr7       | 1          |
| Acid phosphatase-like 2                                                                                                | <b>ACPL2</b>               | NM_152282        | Hs.255491 | chr3       | 1          |
| Activin A receptor, type IC                                                                                            | <b>ACVR1C</b>              | NM_145259        | Hs.352338 | chr2       | 1          |
| disintegrin and metalloproteinase domain 10 ADAM10                                                                     | <b>ADAM10</b>              | NM_001110        | Hs.578508 | chr15      | 1          |
| alcohol dehydrogenase 5 (class III) chi polypeptide                                                                    | <b>ADH5</b>                | NM_000671        | Hs.78989  | chr4       | 1          |
| aldehyde dehydrogenase 1 family, member A3                                                                             | <b>ALDH1A3</b>             | NM_000693        | Hs.459538 | chr15      | 1          |
| apolipoprotein D                                                                                                       | <b>APOD</b>                | NM_001647        | Hs.522555 | chr3       | 2          |
| Rho GTPase activating protein 15                                                                                       | <b>ARHGAP15</b>            | NM_018460        | Hs.171011 | chr2       | 1          |
| AT rich interactive domain 5B                                                                                          | <b>ARID5B</b>              | NM_032199        | Hs.535297 | chr10      | 1          |
| Activating signal cointegrator 1 complex subunit 1                                                                     | <b>ASCC1</b>               | NM_015947        | Hs.500007 | chr10      | 1          |
| ATPase, H+ transporting, lysosomal 56/58kDa, V1 PTD012 protein (PTD012)                                                | <b>ATP6V1B2</b>            | NM_001693        | Hs.295917 | chr8       | 1          |
| PTD012 protein (PTD012)                                                                                                | <b>C11orf54</b>            | NM_014039        | Hs.8360   | chr11      | 1          |
| Chromosome 18 open reading frame 19                                                                                    | <b>C18orf19</b>            | NM_152352        | Hs.13034  | chr18      | 3          |
| chromosome 3 open reading frame 1                                                                                      | <b>C3orf1</b>              | NM_016589        | Hs.477287 | chr3       | 1          |
| Ca <sup>2+</sup> -dependent activator protein for secretion 2 calumenin                                                | <b>CADPS2</b>              | NM_017954        | Hs.126730 | chr7       | 1          |
| CD164 antigen, sialomucin                                                                                              | <b>CD164<sup>b</sup></b>   | NM_006016        | Hs.520313 | chr6       | 1RGP, 1Met |
| antigen identified by monoclonal antibody MRC OX-2                                                                     | <b>CD200</b>               | NM_005944        | Hs.79015  | chr3       | 3          |
| CD36 antigen (collagen type I receptor, thrombospondinreceptor)                                                        | <b>CD36</b>                | NM_000072        | Hs.120949 | chr7       | 1          |
| CD59 antigen p18-20                                                                                                    | <b>CD59</b>                | NM_000611        | Hs.278573 | chr11      | 9          |
| chitinase 3-like 2                                                                                                     | <b>CHI3L2</b>              | NM_004000        | Hs.514840 | chr1       | 2          |
| C-type lectin domain family 2, member B                                                                                | <b>CLECSF2<sup>b</sup></b> | NM_005127        | Hs.85201  | chr12      | 1RGP, 1Met |
| collectin sub-family member 10 (C-type lectin)                                                                         | <b>COLEC10</b>             | NM_006438        | Hs.176615 | chr8       | 1          |
| Coatomer protein complex, subunit zeta 1                                                                               | <b>COPZ1<sup>b</sup></b>   | NM_016057        | Hs.505652 | chr12      | 1          |
| carboxypeptidase D                                                                                                     | <b>CPD</b>                 | NM_001304        | Hs.446079 | chr17      | 1          |
| cytoplasmic polyadenylation element binding protein 4                                                                  | <b>CPEB4</b>               | NM_030627        | Hs.127126 | chr5       | 1          |
| carboxypeptidase M                                                                                                     | <b>CPM</b>                 | NM_001005502     | Hs.484551 | chr12      | 2          |
| carboxypeptidase, vitellogenic-like                                                                                    | <b>CPVL</b>                | NM_019029        | Hs.233389 | chr7       | 1          |
| cartilage associated protein                                                                                           | <b>CRTAP</b>               | NM_006371        | Hs.517888 | chr3       | 1          |
| connective tissue growth factor                                                                                        | <b>CTGF</b>                | U14750           | Hs.591346 | chr6       | 1          |
| catenin (cadherin-associated protein), beta 1, 88kDa                                                                   | <b>CTNNB1</b>              | NM_001904        | Hs.476018 | chr3       | 1          |
| catenin (cadherin-associated protein), delta 1                                                                         | <b>CTNND1</b>              | NM_001331        | Hs.166011 | chr11      | 1          |
| cathepsin K (pseudodeficiency)                                                                                         | <b>CTSK</b>                | NM_000396        | Hs.632466 | chr1       | 2          |
| cullin 5                                                                                                               | <b>CUL5</b>                | NM_003478        | Hs.440320 | chr11      | 1          |
| cylindromatosis (turban tumor syndrome)                                                                                | <b>CYLD</b>                | NM_015247        | Hs.578973 | chr16      | 1          |
| dopachrome tautomerase (dopachrome delta-isomerase tyrosine-related protein 2)                                         | <b>DCT</b>                 | NM_001922        | Hs.301865 | chr13      | 6          |
| DEAD (Asp-Glu-Ala-Asp) box polypeptide 5                                                                               | <b>DDX5</b>                | NM_004396        | Hs.279806 | chr17      | 1          |



|                                                              |                           |              |           |       |            |
|--------------------------------------------------------------|---------------------------|--------------|-----------|-------|------------|
| DEAD/H (Asp-Glu-Ala-Asp/His) box polypeptide 8 (RNAhelicase) | <b>DHX8</b>               | NM_004941    | Hs.463105 | chr17 | 1          |
| dynein, light chain, Tctex-type 3                            | <b>DYNLT3</b>             | NM_006520    | Hs.446392 | chrX  | 1          |
| E3 ubiquitin protein ligase, HECT domain containing, 1       | <b>EDD1</b>               | NM_015902    | Hs.591856 | chr8  | 1          |
| eukaryotic translation initiation factor 1A, Y chromosome    | <b>EIF1AY</b>             | NM_004681    | Hs.461178 | chrY  | 1          |
| KIAA0830 protein                                             | <b>ENDOD1</b>             | BC026191     | Hs.167115 | chr11 | 1          |
| EphA3                                                        | <b>EPHA3</b>              | NM_005233    | Hs.123642 | chr3  | 1          |
| SEC10-like 1 ( <i>S. cerevisiae</i> )                        | <b>EXOC5</b>              | NM_006544    | Hs.334936 | chr14 | 1          |
| fatty acid binding protein 7, brain                          | <b>FABP7</b>              | NM_001446    | Hs.26770  | chr6  | 1          |
| Family with sequence similarity 60, member A                 | <b>FAM60A<sup>b</sup></b> | NM_021238    | Hs.505154 | chr12 | 1RGP, 1Met |
| cDNA DKFZp586I0521                                           | <b>FAM80B</b>             | AL137567     | Hs.504670 | chr12 | 1          |
| Family with sequence similarity 82, member B                 | <b>FAM82B</b>             | AK000672     | Hs.145386 | chr8  | 1          |
| Fc receptor homolog expressed in B cells                     | <b>FCRLM1</b>             | NM_032738    | Hs.266331 | chr1  | 1          |
| Farnesyl-diphosphate farnesyltransferase 1                   | <b>FDFT1</b>              | NM_004462.3  | Hs.593928 | chr8  | 1          |
| hypothetical protein LOC392636                               | <b>FLJ16237</b>           | NM_001004320 | Hs.155348 | chr7  | 1          |
| fibronectin 1                                                | <b>FN1</b>                | NM_002026    | Hs.203717 | chr2  | 1          |
| frizzled homolog 1 ( <i>Drosophila</i> )                     | <b>FZD1</b>               | NM_003505    | Hs.94234  | chr7  | 1          |
| Ras-GTPase activating protein SH3 domain-bindingprotein 2    | <b>G3BP2</b>              | NM_012297    | Hs.303676 | chr4  | 3          |
| cDNA UGPQ mRNA, complete cds                                 | <b>GDPD1</b>              | AY271346     | Hs.631744 | chr17 | 1          |
| Glycoprotein M6B                                             | <b>GPM6B</b>              | NM_001001994 | Hs.495710 | chrX  | 3          |
| Homo sapiens G protein-coupled receptor 126                  | <b>GPR126</b>             | NM_020455    | Hs.318894 | chr6  | 1          |
| G-rich RNA sequence binding factor 1                         | <b>GRSF1</b>              | NM_002092    | Hs.309763 | chr4  | 1          |
| general transcription factor IIH                             | <b>GTF2H1</b>             | NM_005316    | Hs.577202 | chr11 | 1          |
| major histocompatibility complex, class II                   | <b>HLA-DRA</b>            | NM_019111    | Hs.520048 | chr6  | 55         |
| hemicentin                                                   | <b>HMCN1</b>              | NM_031935    | Hs.58877  | chr1  | 1          |
| high-mobility group box 1                                    | <b>HMGB1</b>              | NM_002128    | Hs.434102 | chr13 | 1          |
| Hermansky-Pudlak syndrome 5                                  | <b>HPS5</b>               | NM_181507    | Hs.437599 | chr11 | 1          |
| heat shock 90kDa protein 1, beta                             | <b>HSP90AB1</b>           | NM_007355    | Hs.509736 | chr6  | 1          |
| shock 70kDa protein 5 (glucose-regulated protein78kDa)       | <b>HSPA5</b>              | NM_005347    | Hs.605502 | chr9  | 1          |
| insulin-degrading enzyme                                     | <b>IDE</b>                | NM_004969    | Hs.500546 | chr10 | 1          |
| interferon-induced protein with tetratricopeptide repeats 1  | <b>IFIT1</b>              | NM_001548    | Hs.20315  | chr10 | 1          |
| interleukin 1 receptor accessory protein                     | <b>IL1RAP</b>             | NM_002182    | Hs.478673 | chr3  | 1          |
| interleukin 6 (interferon, beta 2)                           | <b>IL6</b>                | NM_000600    | Hs.512234 | chr7  | 1          |
| interleukin enhancer binding factor 2, 45kDa                 | <b>ILF2</b>               | NM_004515    | Hs.75117  | chr1  | 1          |
| inositol(myo)-1(or 4)-monophosphatase 1                      | <b>IMPA1</b>              | NM_005536    | Hs.555086 | chr8  | 1          |
| integrin, alpha 6                                            | <b>ITGA6</b>              | NM_000210    | Hs.133397 | chr2  | 1          |
| integrin, beta 1 (fibronectin receptor)                      | <b>ITGB1</b>              | NM_133376    | Hs.643813 | chr10 | 1          |
| Integrin, beta 8                                             | <b>ITGB8</b>              | NM_002214    | Hs.592171 | chr7  | 4          |
| inositol 1,4,5-triphosphate receptor, type 1                 | <b>ITPR1</b>              | NM_002222    | Hs.567295 | chr3  | 3          |
| cDNA clone IMAGE:5312122                                     | <b>KIAA0738</b>           | BC039457     | Hs.406492 | chr7  | 1          |
| KIAA1815                                                     | <b>KIAA1815</b>           | NM_024896.2  | Hs.591078 | chr9  | 1          |
| cDNA clone CS0DF027YK02                                      | <b>KIF2</b>               | CR601526     | Hs.558351 | chr5  | 1          |
| Kelch-like 9 ( <i>Drosophila</i> )                           | <b>KLHL9</b>              | NM_018847    | Hs.522029 | chr9  | 1          |
| Karyopherin alpha 1                                          | <b>KPNA1</b>              | NM_002264.2  | Hs.161008 | chr3  | 1          |
| laminin, alpha 4                                             | <b>LAMA4</b>              | NM_002290    | Hs.213861 | chr6  | 2          |
| lysosomal-associated membrane protein 2                      | <b>LAMP2</b>              | NM_002294    | Hs.496684 | chrX  | 1          |

|                                                                 |                           |                |           |       |            |
|-----------------------------------------------------------------|---------------------------|----------------|-----------|-------|------------|
| cDNA DKFZp686P07116, proximo gene PYGO1                         | <b>LOC283658</b>          | AL833463       | Hs.87194  | chr15 | 1          |
| EUROIMAGE 2005635, próximo do mir146a                           | <b>LOC285628</b>          | AL389942       | Hs.604728 | chr5  | 3          |
| Similar to RIKEN cDNA 2310016C16                                | <b>LOC493869</b>          | NM_001008397.1 | Hs.289044 | chr5  | 1          |
| cDNA EUROIMAGE 588495, mRNA                                     | <b>LOC58489</b>           | BC059401       | Hs.459072 | chr15 | 1          |
| cDNA clone IMAGE:5578073                                        | <b>LOC643401</b>          | BC039509       | Hs.533212 | chr5  | 1          |
| loss of heterozygosity, 11, chromosomal region 2, geneA         | <b>LOH11CR2A</b>          | NM_014622      | Hs.152944 | chr11 | 1          |
| low density lipoprotein-related protein 2                       | <b>LRP2</b>               | NM_004525      | Hs.470538 | chr2  | 1          |
| LTV1 homolog (S. cerevisiae)                                    | <b>LTV1</b>               | NM_032860      | Hs.185675 | chr6  | 1          |
| Mitogen-activated protein kinase 1                              | <b>MAPK1</b>              | NM_002745      | Hs.431850 | chr22 | 1          |
| muscleblind-like 2 (Drosophila)                                 | <b>MBNL2</b>              | NM_144778      | Hs.134221 | chr13 | 1          |
| matrix Gla protein                                              | <b>MGP</b>                | NM_000900      | Hs.365706 | chr12 | 1          |
| Mesoderm induction early response 1, family member 3            | <b>MIER3</b>              | NM_152622.3    | Hs.657594 | chr5  | 1          |
| microphthalmia-associated transcription factor melan-A          | <b>MITF</b>               | NM_000248      | Hs.166017 | chr3  | 1          |
| myeloid/lymphoid or mixed-lineage leukemia3                     | <b>MLANA</b>              | NM_005511      | Hs.154069 | chr9  | 2          |
| matrix metalloproteinase 8 (neutrophil collagenase)             | <b>MLL3</b>               | NM_170606      | Hs.647120 | chr7  | 1          |
| mitochondrial ribosomal protein L32                             | <b>MMP8</b>               | NM_002424      | Hs.161839 | chr11 | 1          |
| mitochondrial ribosomal protein L42                             | <b>MRPL32</b>             | NM_031903      | Hs.50252  | chr7  | 1          |
| Metadherin                                                      | <b>MRPL42</b>             | NM_172178      | Hs.199579 | chr12 | 2          |
| myotubularin related protein 6                                  | <b>MTDH</b>               | NM_178812      | Hs.377155 | chr8  | 1          |
| mitochondrial tumor suppressor gene 1                           | <b>MTMR6</b>              | NM_004685      | Hs.643702 | chr13 | 1          |
| Neuroblastoma breakpoint family, member 14                      | <b>MTUS1</b>              | NM_020749      | Hs.7946   | chr8  | 3          |
| nuclear receptor coactivator 4                                  | <b>NBPF14<sup>b</sup></b> | NM_015383      | Hs.607640 | chr1  | 1RGP, 1Met |
| Nuclear factor I/B                                              | <b>NCOA4</b>              | NM_005437      | Hs.643658 | chr10 | 1          |
| NF-kappa B-repressing factor                                    | <b>NFIB</b>               | NM_005596.2    | Hs.370359 | chr9  | 1          |
| nucleophosmin (nucleolar phosphoprotein B23)                    | <b>NKRF</b>               | NM_017544      | Hs.437084 | chrX  | 1          |
| neuronal cell adhesion molecule                                 | <b>NPM1</b>               | NM_002520      | Hs.557550 | chr5  | 1          |
| Neuropilin 2                                                    | <b>NRCAM</b>              | NM_005010      | Hs.21422  | chr7  | 1          |
| Neurexin 3                                                      | <b>NRP2</b>               | NM_003872      | Hs.471200 | chr2  | 2          |
| origin recognition complex, subunit 4-like                      | <b>NRXN3</b>              | NM_004796      | Hs.368307 | chr14 | 1          |
| oxidase (cytochrome c) assembly 1-like                          | <b>ORC4L</b>              | NM_002552      | Hs.558364 | chr2  | 1          |
| purinergic receptor P2Y, G-protein coupled, 5                   | <b>OXA1L</b>              | NM_005015      | Hs.151134 | chr14 | 1          |
| poly(A) binding protein, cytoplasmic 1                          | <b>P2RY5</b>              | NM_005767      | Hs.123464 | chr13 | 1          |
| Phosphoprotein associated with glycosphingolipid microdomains 1 | <b>PABPC1</b>             | NM_002568      | Hs.387804 | chr8  | 1          |
| pre-B-cell colony-enhancing factor                              | <b>PAG1</b>               | NM_018440.3    | Hs.266175 | chr8  | 1          |
| platelet-derived growth factor receptor, alpha                  | <b>PBEF1<sup>b</sup></b>  | NM_005746      | Hs.489615 | chr7  | 1RGP, 1Met |
| peroxisomal biogenesis factor 3                                 | <b>PDGFRA</b>             | NM_006206      | Hs.74615  | chr4  | 2          |
| phosphoglycerate mutase 1 (brain)                               | <b>PEX3</b>               | NM_003630      | Hs.7277   | chr6  | 1          |
| proteolipid protein 1                                           | <b>PGAM1</b>              | NM_002629      | Hs.632918 | chr12 | 1          |
| Chromosome 13 open reading frame 12                             | <b>PLP1</b>               | NM_000533      | Hs.1787   | chrX  | 24         |
| Protein phosphatase 2C, magnesium-dependent, catalytic subunit  | <b>POMP</b>               | NM_015932      | Hs.268742 | chr13 | 2          |
| proteoglycan 1, secretory granule                               | <b>PPM2C</b>              | NM_018444      | Hs.22265  | chr8  | 1          |
| prion protein (p27-30)                                          | <b>PRG1</b>               | NM_002727      | Hs.1908   | chr10 | 1          |
| proteasome (prosome, macropain) subunit, alpha type, 1          | <b>PRNP</b>               | NM_183079      | Hs.472010 | chr20 | 1          |
|                                                                 | <b>PSMA1</b>              | NM_148976      | Hs.102798 | chr11 | 1          |

|                                                                        |                            |           |           |       |            |
|------------------------------------------------------------------------|----------------------------|-----------|-----------|-------|------------|
| proteasome (prosome, macropain) 26S subunit                            | <b>PSMD12</b>              | NM_174871 | Hs.646575 | chr17 | 1          |
| protein tyrosine phosphatase, non-receptor type 3                      | <b>PTPN3</b>               | NM_002829 | Hs.436429 | chr9  | 1          |
| retinoic acid induced 14                                               | <b>RAI14</b>               | NM_015577 | Hs.431400 | chr5  | 1          |
| retinoic acid receptor, beta                                           | <b>RARB</b>                | NM_016152 | Hs.536687 | chr3  | 1          |
| retinoblastoma 1 (including osteosarcoma)                              | <b>RB1</b>                 | NM_000321 | Hs.408528 | chr13 | 1          |
| RNA binding motif protein, X-linked 2                                  | <b>RBMX2</b>               | NM_016024 | Hs.61184  | chrX  | 1          |
| radixin                                                                | <b>RDX</b>                 | NM_002906 | Hs.263671 | chr11 | 2          |
| cDNA clone MGC:24463 IMAGE:4082362, mRNA                               | <b>REEP3</b>               | BC018658  | Hs.499833 | chr10 | 1          |
| ring finger protein 111                                                | <b>RNF111</b>              | NM_017610 | Hs.404423 | chr15 | 1          |
| ribosomal protein L36a                                                 | <b>RPL36A</b>              | NM_021029 | Hs.432485 | chrX  | 1          |
| ribosomal protein S13                                                  | <b>RPS13</b>               | NM_001017 | Hs.446588 | chr11 | 1          |
| ribosomal protein S4, Y-linked                                         | <b>RPS4Y1</b>              | NM_001008 | Hs.282376 | chrY  | 1          |
| Remodeling and spacing factor 1                                        | <b>RSF1</b>                | NM_016578 | Hs.420229 | chr11 | 1          |
| scrapie responsive protein 1                                           | <b>SCRG1</b>               | NM_007281 | Hs.7122   | chr4  | 1          |
| KIAA0193 gene product                                                  | <b>SCRN1</b>               | NM_014766 | Hs.520740 | chr7  | 1          |
| SDA1 domain containing 1                                               | <b>SDAD1</b>               | NM_018115 | Hs.632604 | chr4  | 1          |
| selenoprotein K                                                        | <b>SELK</b>                | NM_021237 | Hs.58471  | chr3  | 1          |
| serine (or cysteine) proteinase inhibitor                              | <b>SERPINE2</b>            | NM_006216 | Hs.38449  | chr2  | 4          |
| secreted frizzled-related protein 1                                    | <b>SFRP1</b>               | NM_003012 | Hs.213424 | chr8  | 1          |
| splicing factor, arginine/serine-rich 2                                | <b>SFRS2</b>               | NM_003016 | Hs.584801 | chr17 | 1          |
| serum/glucocorticoid regulated kinase                                  | <b>SGK</b>                 | NM_005627 | Hs.510078 | chr6  | 2          |
| solute carrier family 35, member A5                                    | <b>SLC35A5</b>             | NM_017945 | Hs.237480 | chr3  | 1          |
| solute carrier family 38, member 2                                     | <b>SLC38A2<sup>b</sup></b> | NM_018976 | Hs.221847 | chr12 | 1RGP, 1Met |
| Solute carrier family 39 (zinc transporter), member 9                  | <b>SLC39A9</b>             | NM_018375 | Hs.432690 | chr14 | 1          |
| solute carrier family 5 (low affinity glucose cotransporter), member 4 | <b>SLC5A4</b>              | NM_014227 | Hs.130101 | chr22 | 2          |
| small nuclear ribonucleoprotein polypeptide B                          | <b>SNRPB2</b>              | NM_003092 | Hs.280378 | chr20 | 1          |
| small nuclear ribonucleoprotein polypeptide G                          | <b>SNRPG<sup>b</sup></b>   | NM_003096 | Hs.516076 | chr2  | 1RGP, 1Met |
| Spermatogenesis associated, serine-rich 1                              | <b>SPATS1</b>              | NM_145026 | Hs.135283 | chr6  | 1          |
| secreted phosphoprotein 1 (osteopontin)                                | <b>SPP1</b>                | NM_000582 | Hs.313    | chr4  | 2          |
| sprouty-related, EVH1 domain containing 1                              | <b>SPRED1</b>              | NM_152594 | Hs.525781 | chr15 | 1          |
| sprouty homolog 4 (Drosophila)                                         | <b>SPRY4</b>               | NM_030964 | Hs.323308 | chr5  | 1          |
| sperm specific antigen 2                                               | <b>SSFA2</b>               | NM_006751 | Hs.591602 | chr2  | 1          |
| synaptotagmin-like 2                                                   | <b>SYTL2</b>               | NM_032943 | Hs.369520 | chr11 | 1          |
| tryptophan 2,3-dioxygenase                                             | <b>TDO2</b>                | NM_005651 | Hs.183671 | chr4  | 7          |
| transferrin                                                            | <b>TF</b>                  | NM_001063 | Hs.518267 | chr3  | 1          |
| transforming growth factor, beta-induced, 68kDa                        | <b>TGFBI</b>               | NM_000358 | Hs.369397 | chr5  | 1          |
| thrombospondin 2                                                       | <b>THBS2</b>               | NM_003247 | Hs.371147 | chr6  | 1          |
| tissue inhibitor of metalloproteinase 3                                | <b>TIMP3</b>               | NM_000362 | Hs.644633 | chr22 | 1          |
| transmembrane 4 superfamily member 1                                   | <b>TM4SF1</b>              | NM_014220 | Hs.351316 | chr3  | 10         |
| Transmembrane protein 100                                              | <b>TMEM100</b>             | NM_018286 | Hs.173233 | chr17 | 1          |
| Transmembrane protein 131                                              | <b>TMEM131</b>             | BC036841  | Hs.469376 | chr2  | 1          |
| transmembrane protein 2 (TMEM2)                                        | <b>TMEM2</b>               | NM_013390 | Hs.494146 | chr9  | 1          |
| Transmembrane and tetratricopeptide repeat containing 3                | <b>TMTC3<sup>b</sup></b>   | CR749309  | Hs.331268 | chr12 | 1RGP, 1Met |
| tumor necrosis factor, alpha-induced protein 6                         | <b>TNFAIP6</b>             | NM_007115 | Hs.437322 | chr2  | 1          |
| Tumor necrosis factor superfamily, member 5-induced protein 1          | <b>TNFSF5IP1</b>           | NM_020232 | Hs.464652 | chr18 | 1          |
| thiamin pyrophosphokinase 1                                            | <b>TPK1</b>                | NM_022445 | Hs.490454 | chr10 | 1          |

|                                                                                   |                          |              |           |       |            |
|-----------------------------------------------------------------------------------|--------------------------|--------------|-----------|-------|------------|
| Tripartite motif-containing 33                                                    | <b>TRIM33</b>            | NM_015906    | Hs.26837  | chr1  | 1          |
| tumor susceptibility gene 101                                                     | <b>TSG101</b>            | NM_006292    | Hs.523512 | chr11 | 1          |
| tyrosinase (oculocutaneous albinism IA)                                           | <b>TYR</b>               | NM_000372    | Hs.503555 | chr11 | 2          |
| tyrosinase-related protein 1                                                      | <b>TYRP1</b>             | NM_000550    | Hs.270279 | chr9  | 2          |
| UDP-glucose ceramide glucosyltransferase-like 2                                   | <b>UGCGL2</b>            | NM_020121    | Hs.193226 | chr13 | 1          |
| UDP-glucose pyrophosphorylase 2                                                   | <b>UGP2</b>              | NM_006759    | Hs.516217 | chr2  | 1          |
| UDP glycosyltransferase 8 (UDP-galactose ceramidegalactosyltransferase)           | <b>UGT8</b>              | NM_003360    | Hs.144197 | chr4  | 1          |
| ubiquinol-cytochrome c reductase hinge protein                                    | <b>UQCRH</b>             | NM_006004    | Hs.481571 | chr1  | 1          |
| Chromosome 14 open reading frame 150                                              | <b>WDR89</b>             | NM_080666    | Hs.509585 | chr14 | 1          |
| tyrosine 3-monooxyg./tryp. 5-monooxyg.activ. prot, zeta polypeptide               | <b>YWHAZ<sup>b</sup></b> | NM_145690    | Hs.492407 | chr8  | 1RGP, 1Met |
| cDNA FLJ90443 fis                                                                 | <b>ZC3H13</b>            | AK074924     | Hs.136102 | chr13 | 1          |
| Zinc finger protein 512                                                           | <b>ZNF512</b>            | NM_032434.2  | Hs.529178 | chr2  | 1          |
| EST                                                                               |                          | BQ437417     | Hs.633116 | chr1  | 1          |
| clone IMAGE:5019705 extremidade 5' do SIDT2 ou 3'doPAFAH1B2                       |                          | BC021287     | Hs.410977 | chr11 | 1          |
| EST                                                                               |                          | BC037984     | Hs.91791  | chr11 | 1          |
| cDNA FLJ31578 fis, clone NT2RI2001952                                             |                          | AK056140     | Hs.505983 | chr12 | 1          |
| EST                                                                               |                          | AA012878     | Hs.434604 | chr12 | 1          |
| EST                                                                               |                          | BE799296     | Hs.434604 | chr12 | 1          |
| EST                                                                               |                          | BX382682     | Hs.199579 | chr12 | 1          |
| EST                                                                               |                          | AI831849     | Hs.271014 | chr12 | 1          |
| cDNA deleted in lymphocytic leukemia, 2 (DLEU2)                                   |                          | NM_006021    | Hs.547964 | chr13 | 1          |
| EST                                                                               |                          | BF343525     | Hs.134687 | chr15 | 1          |
| cDNA hypothetical protein LOC146481, mRNA (cDNA clone IMAGE:4639919), partial cds |                          | BC023607     | Hs.316564 | chr16 | 1          |
| cDNA FLJ26484 fis                                                                 |                          | AK129994     | Hs.447555 | chr17 | 1          |
| EST                                                                               |                          | DA506880     |           | chr17 | 1          |
| cDNA FLJ25631 fis                                                                 |                          | AK098497     | Hs.464416 | chr18 | 1          |
| EST                                                                               |                          | AI610957     | Hs.594083 | chr18 | 1          |
| EST                                                                               |                          | G36677       |           | chr18 | 1          |
| cDNA hypothetical protein FLJ37953                                                |                          | NM_001039693 | Hs.204619 | chr2  | 1          |
| cDNA: FLJ22105 fis, próximo gene NFATC2                                           |                          | AK025758     | Hs.356321 | chr20 | 1          |
| EST                                                                               |                          | AX750578     |           | chr21 | 1          |
| cDNA, IMAGE:5278517, extremidade 5'do gene NR2C2                                  |                          | BC039246     | Hs.651299 | chr3  | 1          |
| cDNA clone IMAGE:3919084tissue_type="Skin, melanotic melanoma                     |                          | BC028978     | Hs.374715 | chr5  | 1          |
| EST                                                                               |                          | AA046162     |           | chr5  | 1          |
| EST                                                                               |                          | BU183727     |           | chr5  | 1          |
| EST                                                                               |                          | U52054       | Hs.561411 | chr5  | 1          |
| EST                                                                               |                          | DA293172     | Hs.277154 | chr5  | 1          |
| EST                                                                               |                          | CN292792     | Hs.533212 | chr5  | 1          |
| cDNA IMAGE:4706427, intron do C7orf10                                             |                          | BC016631     | Hs.586313 | chr7  | 1          |
| cDNA AF056184                                                                     |                          | AF056184     |           | chr7  | 1          |
| EST                                                                               |                          | BM712473     | Hs.7753   | chr7  | 1          |
| EST                                                                               |                          | BG110543     | Hs.133107 | chr8  | 1          |
| EST                                                                               |                          | BE142170     |           | chrX  | 1          |

---

<sup>a</sup> Identification was done by BLAST or BLAT searches with the ESTs (deposited under GenBank accession numbers: ES316050-ES316435) obtained from Met SSH library.

<sup>b</sup> Genes identified in both RGP and Met SSH libraries
