# Supplementary material for: Suppression subtractive hybridization profiles of radial growth phase and metastatic melanoma cell lines reveal novel potential targets
Source: PubMed Central journal article supplement (PMC2267200; doi:10.1186/1471-2407-8-19), 2008-01-22
Supplement: 1471-2407-8-19-S5.pdf [file 1471-2407-8-19-S5.pdf]

**Additional File 5:** Search for the expression profile of the genes identified in the RGP and Met libraries in a melanoma microarray study performed by Hoek et al. [92]. The tables contain the lists of the genes represented in the RGP and Met libraries that were detected as differentially expressed between melanocytes and melanoma cell lines in the above cited study.

**Table S5: RGP library genes detected as up-regulated in melanoma cells in comparison to melanocytes in the study by Hoek et al [92]\*.**

| Gene name                                          | Symbol         | Accession number |
|----------------------------------------------------|----------------|------------------|
| amphoterin induced gene 2                          | <b>AMIGO2</b>  | NM_181847        |
| angiopoietin 1                                     | <b>ANGPT1</b>  | NM_001146        |
| adenylate cyclase-associated protein, 2            | <b>CAP2</b>    | AL832154         |
| decorin                                            | <b>DCN</b>     | NM_133503        |
| ectonucleotide pyrophosphatase/phosphodiesterase 1 | <b>ENPP1</b>   | NM_006208        |
| histone deacetylase 1                              | <b>HDAC1</b>   | NM_004964        |
| lumican                                            | <b>LUM</b>     | NM_002345        |
| platelet derived growth factor C                   | <b>PDGFC</b>   | NM_016205        |
| paternally expressed 10                            | <b>PEG10</b>   | NM_015068        |
| pogo transposable element with ZNF domain          | <b>POGZ</b>    | NM_015100        |
| prostaglandin-endoperoxide synthase 2              | <b>PTGS2</b>   | NM_000963        |
| secretogranin II (chromogranin C)                  | <b>SCG2</b>    | NM_003469        |
| solute carrier family 38, member 2                 | <b>SLC38A2</b> | NM_018976        |

**Table S6: Met library genes detected as differentially expressed between melanocytes and melanoma cells in the study by Hoek et al [92]\*.**

|                                         | <b>Gene name</b>                                                       | <b>Symbol</b>  | <b>Accession number</b> |
|-----------------------------------------|------------------------------------------------------------------------|----------------|-------------------------|
| <b>Up-regulated in melanoma cells</b>   | aldehyde dehydrogenase 1 family, member A3                             | <b>ALDH1A3</b> | NM_000693               |
|                                         | apolipoprotein D                                                       | <b>APOD</b>    | NM_001647               |
|                                         | calumenin                                                              | <b>CALU</b>    | NM_001219               |
|                                         | connective tissue growth factor                                        | <b>CTGF</b>    | U14750                  |
|                                         | EphA3                                                                  | <b>EPHA3</b>   | NM_005233               |
|                                         | fibronectin 1                                                          | <b>FN1</b>     | NM_002026               |
|                                         | Homo sapiens G protein-coupled receptor 126                            | <b>GPR126</b>  | NM_020455               |
|                                         | major histocompatibility complex, class II                             | <b>HLA-DRA</b> | NM_019111               |
|                                         | interleukin 1 receptor accessory protein                               | <b>IL1RAP</b>  | NM_002182               |
|                                         | integrin, alpha 6                                                      | <b>ITGA6</b>   | NM_000210               |
|                                         | inositol 1,4,5-triphosphate receptor, type 1                           | <b>ITPR1</b>   | NM_002222               |
|                                         | laminin, alpha 4                                                       | <b>LAMA4</b>   | NM_002290               |
|                                         | lysosomal-associated membrane protein 2                                | <b>LAMP2</b>   | NM_002294               |
|                                         | neuronal cell adhesion molecule                                        | <b>NRCAM</b>   | NM_005010               |
|                                         | prion protein (p27-30)                                                 | <b>PRNP</b>    | NM_183079               |
|                                         | solute carrier family 38, member 2                                     | <b>SLC38A2</b> | NM_018976               |
|                                         | transforming growth factor, beta-induced, 68kDa                        | <b>TGFBI</b>   | NM_000358               |
| tissue inhibitor of metalloproteinase 3 | <b>TIMP3</b>                                                           | NM_000362      |                         |
| transmembrane 4 superfamily member 1    | <b>TM4SF1</b>                                                          | NM_014220      |                         |
| <b>Down-regulated in melanoma cells</b> | eukaryotic translation initiation factor 1A, Y-linked                  | <b>EIF1AY</b>  | NM_004681               |
|                                         | interferon-induced protein with tetratricopeptide repeats 1            | <b>IFIT1</b>   | NM_001548               |
|                                         | solute carrier family 5 (low affinity glucose cotransporter), member 4 | <b>SLC5A4</b>  | NM_014227               |
|                                         | tyrosinase (oculocutaneous albinism IA)                                | <b>TYR</b>     | NM_000372               |

\* The reference number corresponds to the number of the reference list of the main text.
