# Supplementary material for: Suppression subtractive hybridization profiles of radial growth phase and metastatic melanoma cell lines reveal novel potential targets
Source: PubMed Central journal article supplement (PMC2267200; doi:10.1186/1471-2407-8-19), 2008-01-22
Supplement: 1471-2407-8-19-S6.pdf [file 1471-2407-8-19-S6.pdf]

**Additional File 6:** Search for the expression profile of the genes identified in the RGP and Met libraries in the proteomics and SAGE analyses performed by de Souza et al. [93]. The table lists the genes represented in the RGP and Met libraries that were detected as differentially expressed between non-tumorigenic and tumorigenic murine melanocytic cell lines in the above cited study.

**Table S7: Genes from the SSH libraries also detected as differentially expressed between non-tumorigenic and tumorigenic murine melanocytic cell lines in the proteomics and SAGE analyses performed by de Souza et al. [93]\***

|                   |                                                     | RGP library genes       | Met Library genes       |
|-------------------|-----------------------------------------------------|-------------------------|-------------------------|
| <b>SAGE</b>       | up-regulated in the nontumoral melanocytic cell     | ATF4                    | CALU<br>EIF1AY<br>TYRP1 |
|                   | up-regulated in the melanoma cell line TM1          | RPS27A<br>LSM5<br>ACTG1 | HSPA5<br>NPM1<br>DDX5   |
| <b>Proteomics</b> | up-regulated in the melanoma cell lines TM1 and TM5 | ACTB                    | NPM1                    |

\* The reference number corresponds to the number of the reference list of the main text.
